# Supplementary material
Source: publisher figshare collection journal article supplement (https://springernature.figshare.com/ndownloader/files/18742307)
Supplement: Supplementary file [file 18742307]

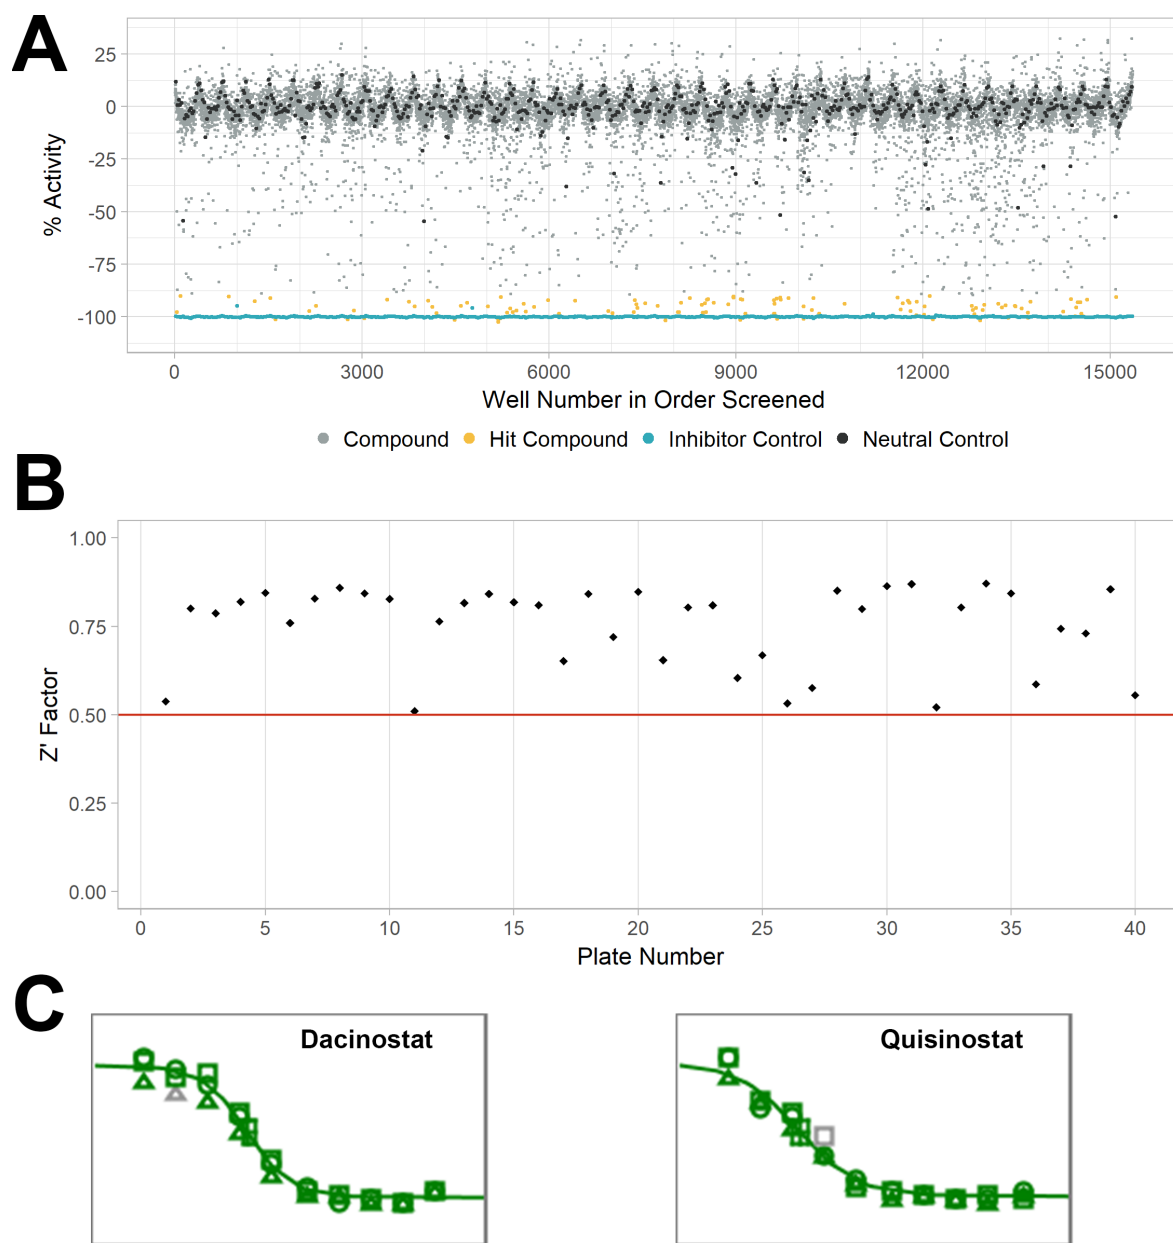

Figure S1. Compound activity and plate Z'-factor for the primary screening.
